# Supplementary material for: Characterising Cytokine Gene Expression Signatures in Patients with Severe Sepsis
Source: Hindawi journal article supplement (doi:10.1155/2013/164246), 2013-01-01
Supplement: f1 [file 164246.f1.docx]

Appendix 2

Table 4. Cytokine mRNA in Medical and Surgical patients with Sepsis at Time of ICU Admission

|  |  | Medical |  | Surgical |
| --- | --- | --- | --- | --- |
| Cytokine |  |  | p |  |
| INFγ |  | 2.2 | ns | 2.3 |
|  | 1.7-2.6  N=31 |  | 2.0-2.7  N=22 |
| TNFα |  | 4.7 | 0.02 | 4.4 |
|  | 4.5-5  N=28 |  | 3.9-4.7  N=22 |
| IL2 |  | 1.9 | ns | 2.1 |
|  | 1.6-2.2  N=18 |  | 1.6-2.2  N=14 |
| IL7 |  | 3.5 | ns | 3.5 |
|  | 3.2-3.7  N=23 |  | 3.2-3.7  N=17 |
| IL10 |  | 3.2 | ns | 3.3 |
|  | 2.8-3.4  N=23 |  | 2.9-3.6  N =29 |
| IL23 |  | 4.5 | ns | 4.6 |
|  | 4.3-4.7  N=31 |  | 4.4-4.9  N=21 |
| IL27 |  | 3.1 | ns | 3.1 |
|  | 2.8-3.4  N=29 |  | 2.7-3.4  N=21 |

**Table 5**

**Cytokine mRNA in patients with severe sepsis with blood samples at time of ICU admission and 7 days later.**

| **Severe Sepsis** | **ICU Admission** | **Day 7** |  |
| --- | --- | --- | --- |
| **Cytokine** |  |  | p |
| INFγ | 2.6 | 2.6 | ns |
|  | 2 - 3 | 2-3 |  |
|  | n = 18 | N=18 |  |
|  |  |  |  |
| TNFα | 4.5 | 4.4 | ns |
|  | 4.3- 5.3 | 4.2-4.9 |  |
|  | n = 17 | N = 17 |  |
|  |  |  |  |
| IL2 | 2.2 | 2.4 | ns |
|  | 1.8-2.7 | 1.9-2.9 |  |
|  | n = 7 | N = 7 |  |
|  |  |  |  |
| IL7 | 3.7 | 3.6 | ns |
|  | 3.3-3.8 | 3.3-3.8 |  |
|  | n = 14 | N=14 |  |
|  |  |  |  |
| IL10 | 3.3 | 3.1 | ns |
|  | 2.8-3.5 | 2.9-3.4 |  |
|  | n = 19 | N = 19 |  |
|  |  |  |  |
| IL23 | 4.5 | 4.5 | ns |
|  | 4.4 – 4.9 | 4.3-4.7 |  |
|  | n =17 | N = 17 |  |
|  |  |  |  |
| IL27 | 3 | 2.8 | ns |
|  | 2.6-3.3 | 2.7-3.2 |  |
|  | n = 17 | N=17 |  |
|  |  |  |  |

**Table 6**

**Cytokine mRNA in patients with severe sepsis at time of all patients at time of ICU admission and 7 days later.**

| **Severe Sepsis** | **ICU Admission** | **Day 7** |  |
| --- | --- | --- | --- |
| **Cytokine** |  |  | P |
| INFγ | 2.3 | 2.6 | 0.03 |
|  | 1.8-2.6 | 2.1-3 |  |
|  | n = 53 | N=29 |  |
|  |  |  |  |
| TNFα | 4.5 | 4.4 | ns |
|  | 4.3- 5 | 4.2-4.9 |  |
|  | n = 50 | N = 32 |  |
|  |  |  |  |
| IL2 | 2 | 2.4 | ns |
|  | 1.6-2.2 | 1.8-2.9 |  |
|  | n = 32 | N = 18 |  |
|  |  |  |  |
| IL7 | 3.4 | 3.7 | 0.04 |
|  | 3.2-3.7 | 3.4-3.8 |  |
|  | n = 40 | N=25 |  |
|  |  |  |  |
| IL10 | 3.2 | 3.1 | ns |
|  | 2.9-3.5 | 2.9-3.4 |  |
|  | n = 52 | N = 32 |  |
|  |  |  |  |
| IL23 | 4.5 | 4.5 | ns |
|  | 4.3-4.8 | 4.2-4.7 |  |
|  | n =51 | N = 32 |  |
|  |  |  |  |
| IL27 | 3.1 | 2.8 | 0.03 |
|  | 2.7-3.4 | 2.5-3.2 |  |
|  | n = 50 | N=32 |  |
|  |  |  |  |

Table 4. Cytokine mRNA in Log base 10 copy numbers, in patients with severe sepsis. All values are medial and interquartile range. Analysis is by Wilcoxon rank sum test. P values are uncorrected.

Table 5. Cytokine mRNA in Log base 10 copy numbers, in patients with severe sepsis. All values are medial and interquartile range. Analysis is by Wilcoxon rank sign test. P values are uncorrected.

Table 6. Cytokine mRNA in Log base 10 copy numbers, in patients with severe sepsis. All values are medial and interquartile range. Analysis is by Wilcoxon rank sum test. P values are uncorrected
